# Supplementary material for: Generalizable design parameters for soluble T cell receptor-based T cell engagers
Source: PubMed Central journal article supplement — J Immunother Cancer. 2022 Mar 8;10(3):e004281. doi: 10.1136/jitc-2021-004281 (PMC8905924; doi:10.1136/jitc-2021-004281), 2022-03-08
Supplement: jitc-2021-004281supp001.pdf [file jitc-2021-004281supp001.pdf]

## Supplementary Figures and Data

**Table S1. Potency of BFP receptor binding and redirected T cell killing of tumor cells**

| <b>BFP</b>           | <b>CD3 binding<br/>IC<sub>50</sub> of<br/>SP34-PE<br/>(nM)</b> | <b>HLA<br/>binding<br/>EC<sub>50</sub> (nM)</b> | <b>Tumor cell killing<br/>with non-activated<br/>T cells and<br/>exogenous antigen<br/>peptide EC<sub>50</sub> (nM)<sup>a</sup></b> | <b>Tumor cell killing with<br/>pre-activated T cells and<br/>endogenous antigen<br/>peptide EC<sub>50</sub> (nM)<sup>b</sup></b> |
|----------------------|----------------------------------------------------------------|-------------------------------------------------|-------------------------------------------------------------------------------------------------------------------------------------|----------------------------------------------------------------------------------------------------------------------------------|
| NY-ESO-1<br>TCR-IgG  | 17                                                             | 10                                              | Inactive                                                                                                                            | n.d. <sup>c</sup> , Inactive                                                                                                     |
| NY-ESO-1<br>TCR-Fab  | 130                                                            | 1.4                                             | 0.1 (90%)                                                                                                                           | n.d., 20 (90%)                                                                                                                   |
| NY-ESO-1<br>TCR-scFv | 230±30 <sup>d</sup>                                            | 2.5                                             | 7.0 (75%)                                                                                                                           | n.d., 200 (50%)                                                                                                                  |
| MAGE-A3<br>TCR-IgG   | 5.7                                                            | 13                                              | Inactive                                                                                                                            | Inactive, 0.6 (60%)                                                                                                              |
| MAGE-A3<br>TCR-Fab   | 130                                                            | 15                                              | 0.7 (100%)                                                                                                                          | 0.7 (95%), 0.6 (100%)                                                                                                            |
| MAGE-A3<br>TCR-scFv  | 110                                                            | 14                                              | 2.1 (100%)                                                                                                                          | 2.0 (95%), 1.0 (100%)                                                                                                            |

<sup>a</sup>NY-ESO-1<sub>157-165</sub> SLLMWITQC or MAGE-A3<sub>168-176</sub> EVDPIGHLV peptide was pre-incubated for 2 hours on Saos-2 or HCT116 cells, respectively, prior to the addition of T cells and BFP.

<sup>b</sup>T cells preactivated with anti-CD3/anti-CD28 and cultured with IL-2 were added with the BFPs onto HCT116 (left number) or A375 (right number) tumor cells. Numbers in parentheses indicates the percent tumor cell killing.

<sup>c</sup>n.d. = not done

<sup>d</sup>Average of 2 separate experiments

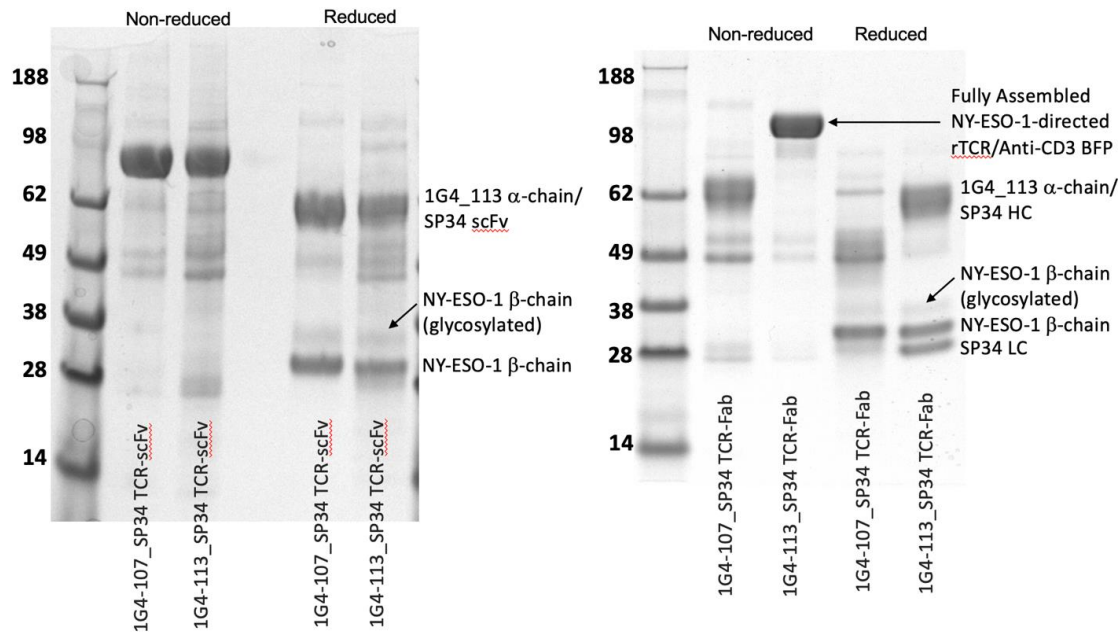

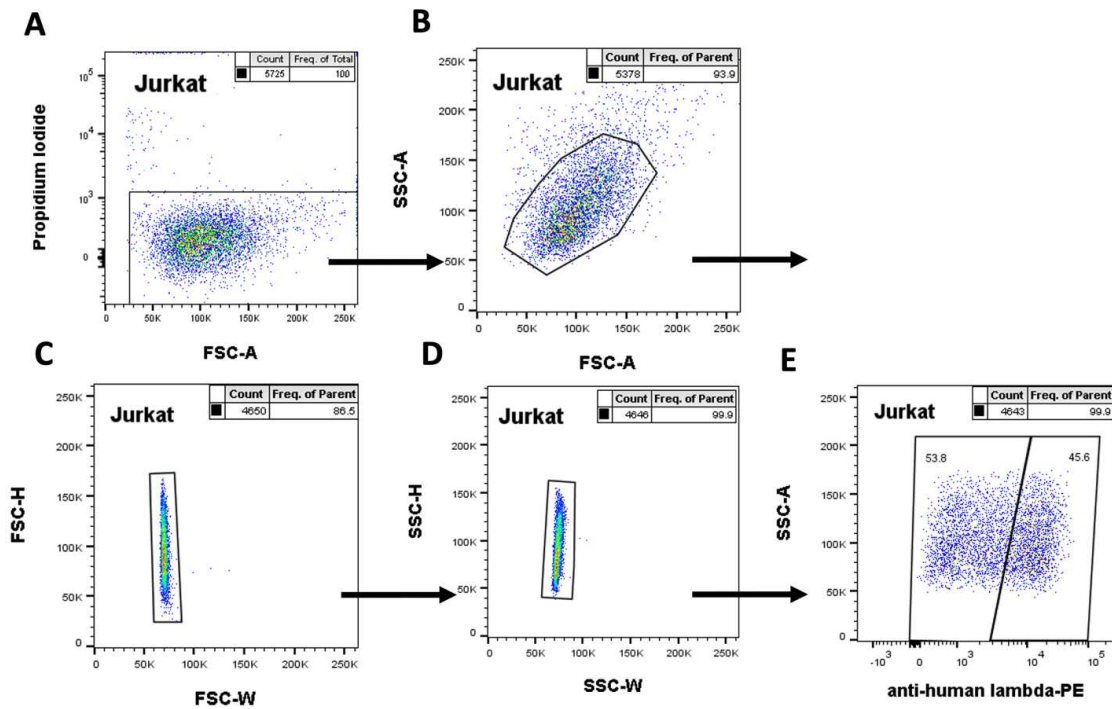

**Figure S2. Gating Strategy for SP34-PE, TCR-IgG and TCR-Fab binding to CD3+ Jurkat cells.** Jurkat cells were centrifuged and incubated for 45 minutes with rTCR/anti-CD3 BFPs. After washing, cells were stained with anti-human lambda-PE and incubated for 45 minutes. Propidium iodide was used as the live/dead cell discriminator. Acquisition was performed on a Becton Dickinson Fortessa using BD FACSDiva software v8.0.1. Analysis was performed using FlowJo v10.7.1. Cells were initially gated based on A: FSC-A vs Propidium Iodide to exclude dead cells. B: FSC-A vs SSC-A to identify cells based on light scattering. C and D: FSC-W vs FSC-H and SSC-W vs SSC-H for doublet discrimination. E: anti-human lambda-PE vs SSC-A was used to detect binding of the BFPs positivity while SP34-PE was directly labeled. Example shown uses the NY-ESO-1-directed TCR-IgG.

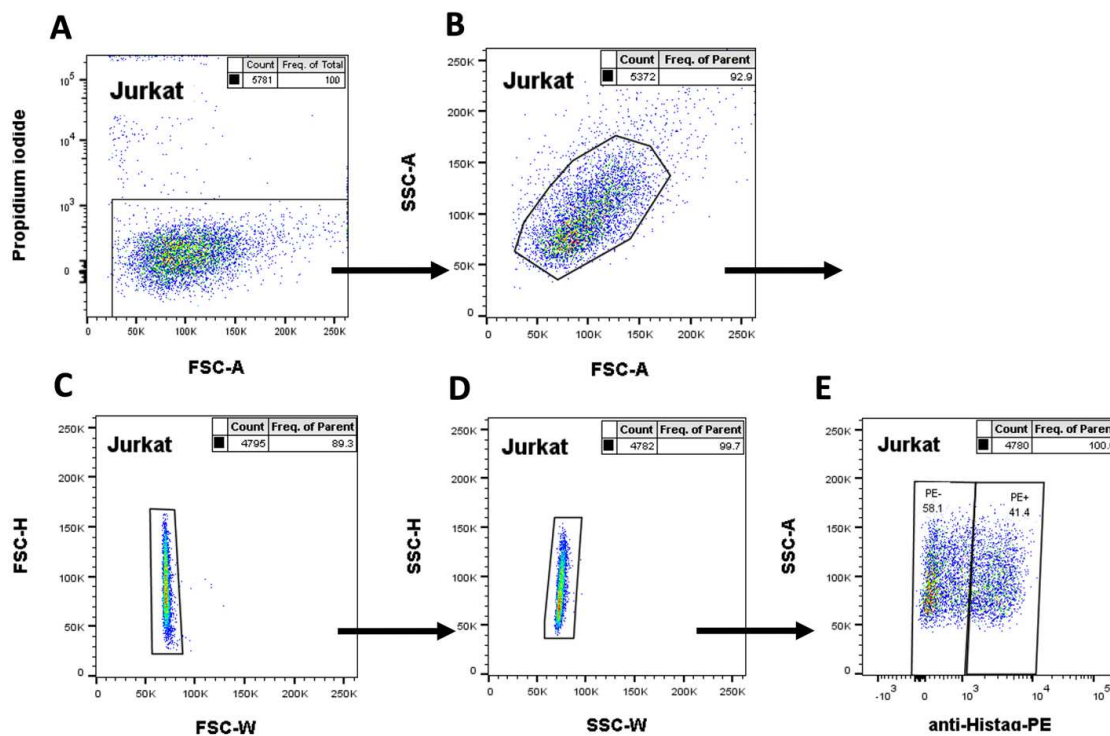

**Figure S3. Gating Strategy for TCR-scFv binding to CD3+ Jurkat cells.** Jurkat cells were centrifuged and incubated for 45 minutes with TCR BsAbs. After washing, cells were stained with anti-Histag-PE and incubated for 45 minutes. Propidium iodide was used as the live/dead cell discriminator. Acquisition was performed on a Becton Dickinson Fortessa using BD FACSDiva software v8.0.1. Analysis was performed using FlowJo v10.7.1. Cells were initially gated based on A: FSC-A vs Propidium Iodide to exclude dead cells. B: FSC-A vs SSC-A to identify the distribution of cells based on light scatter. C and D: FSC-W vs FSC-H and SSC-W vs SSC-H for doublet discrimination. E: anti-Histag-PE vs SSC-A for determination of positivity. Example shown uses the NY-ESO-1-directed TCR-scFv.

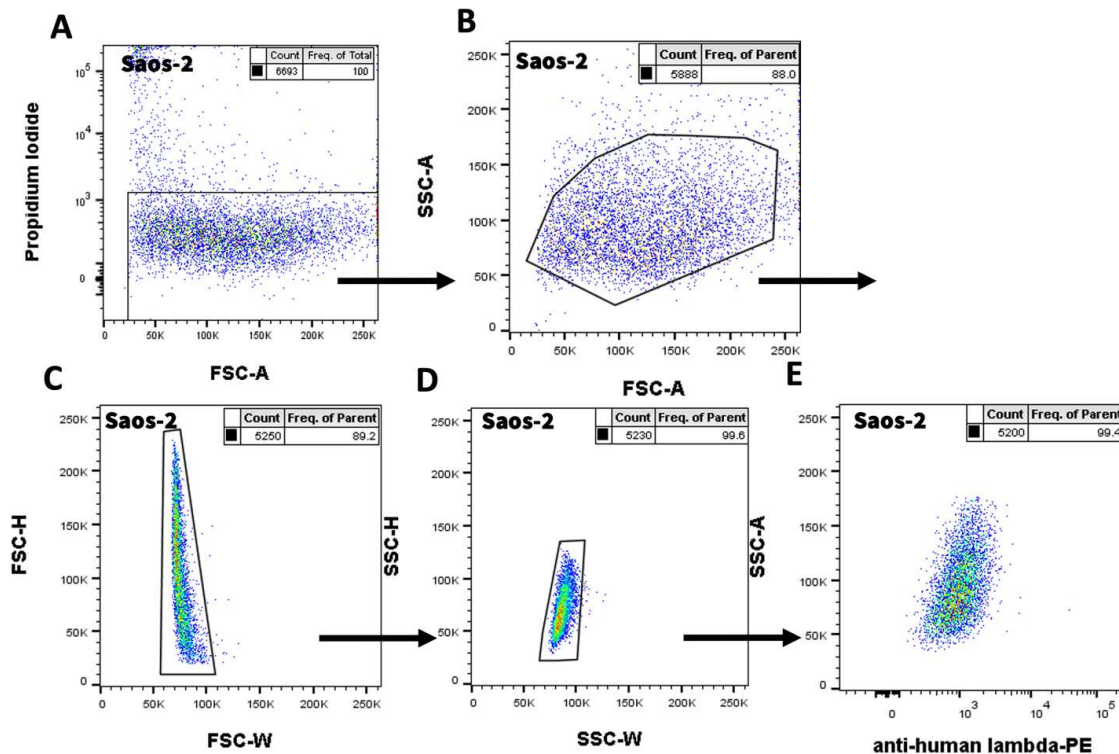

**Figure S4. Gating Strategy for TCR-IgG and TCR-Fab binding to HLA-A2+ Saos-2 cells preloaded with NY-ESO-1157-165 SLLMWITQC peptide.** Saos-2 cells were pulsed with peptide for 3 hrs., centrifuged and incubated for 45 minutes with TCR BsAbs. After washing, cells were stained with anti-human lambda-PE and incubated for 45 minutes. Propidium iodide was used as the live/dead discriminator. Acquisition was performed on a Becton Dickinson Fortessa using BD diva software v8.0.1. Analysis was performed using FlowJo v10.7.1. Cells were initially gated based on A: FSC-A vs Propidium Iodide to exclude dead cells. B: FSC-A vs SSC-A to identify the distribution of cells based on light scatter. C and D: FSC-H vs FSC-W and SSC-H vs SSC-W for doublet discrimination. E: anti-human lambda-PE vs SSC-A for determination of positivity for TCR-IgG and TCR-Fab BFPs.

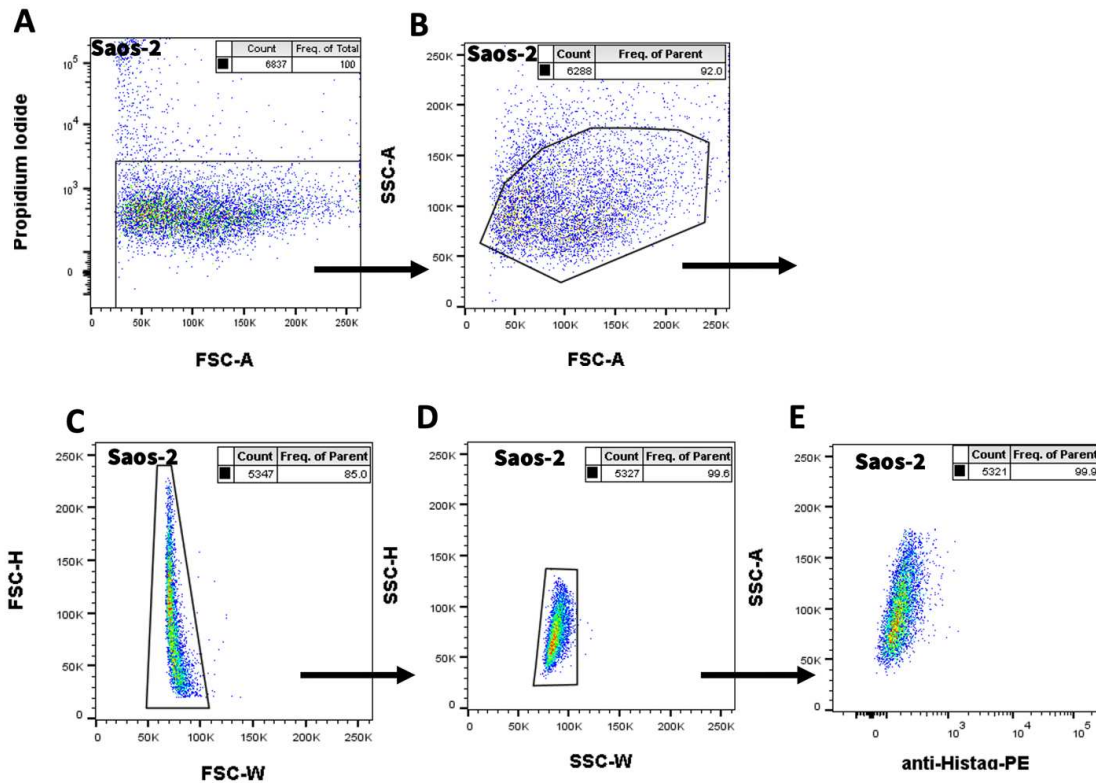

**Figure S5. Gating Strategy for TCR-scFv binding to HLA-A2+ Saos-2 cells preloaded with NY-ESO-1157-165 SLLMWITQC peptide.** Saos2 cells were pulsed with peptide for 3 hrs., centrifuged and incubated for 45 minutes with TCR BsAbs. After washing, cells were stained with anti-Histag-PE and incubated for 45 minutes. Propidium iodide was used as the live/dead discriminator. Acquisition was performed on a Becton Dickinson Fortessa using BD diva software v8.0.1. Analysis was performed using FlowJo v10.7.1. Cells were initially gated based on A: FSC-A vs Propidium Iodide to exclude dead cells. B: FSC-A vs SSC-A to identify the distribution of cells based on light scatter. C and D: FSC-H vs FSC-W and SSC-H vs SSC-W for doublet discrimination. E: anti-Histag-PE vs SSC-A for determination of positivity.

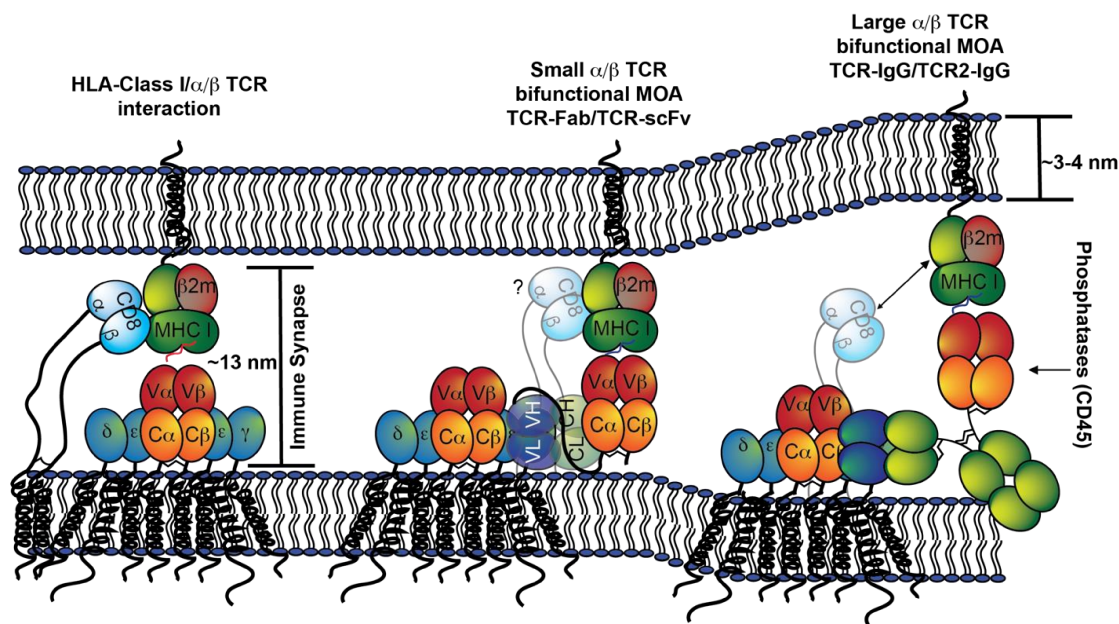

**Figure S6. Schematic diagram depicting hypothetical challenges for the use of large and/or complex rTCR/Anti-CD3 BFPs.** The natural TCR/MHC/CD8 complex formation is depicted on the left side of the diagram including the synaptic distance bridged by the TCR/MHC-peptide interaction as well as the CD8-coreceptor interaction. The rTCR/Anti-CD3 TCR-Fab and TCR-scFv molecules are depicted in the center of the diagram enabling similarly tight synapse formation, while the larger rTCR/Anti-CD3 BFPs exemplified by the TCR-IgG on the right-side of the diagram do not. The potential challenge of co-localizing the TCR-coreceptor CD8 is clear based on the diagram if the synaptic distance is too large.

**Recombinant T cell Receptor/Anti-CD3 Bifunctional Protein Sequences**

**>MAGE-A3 TCR-scFv**

KQEVTVQIPAAALSVPEGENLVLNCSFTDSAIYNLQWFRQDPGKGLTSLLYVVRPYQREQTSGRNLASLDKSSGRSTLYIAASQPGDSA  
TYLCAVRPGGAGPFFVVFVFGKTKLSVIPIYIQNPDPVAVYQLRDSKSSDKFVCLFTDFDSQINVSQSKSDSDVYITDKC  
VLDMRSMDFK  
SNSAVAWSNKSDFTCANAFNNSIIPEDTFFPSPESCGGGGSGGGGSGGGGSEVQLVESGGGLVQPKGSLKLS  
CAASGFTFNTYAMN  
NWVRQAPGKGLEWVARIRSKYNNYATYYADSVKDRFTISRDDSQSLLYLQMN  
NLKTEDTAMYCVRHG  
NFGNSYVSWFAYWGQGLTVTSAGGGGSGGGGSGGGGSAVVQESALTTSPGETVTLTCSRSTGAVTTSNYANWVQEKPDHLFTGLIGG  
TNKRAPGVPARFSGSLIGDKAALTTGAQTEDEAIYFCALWYSNLWVFGGGTKLTVLGS  
DYKDDDDKLEHHHHHHHH

GVTQTPRYLIKTRGQVTLTSCSPISGHRVSVWYQQTPGQGLQFLFEYFSETQRNKG  
NFPGRFSGRQFSNSRSEMNVSTLELGD  
SALYLCASSFNMATGQYFGPGTRLTVTE  
DLKNVFPPEVAVFEPSEKAEISRTQKATLVCLATGFY  
PHVELS  
WVNGKEVHDGVC  
TDPQLKEQPALNDSRYALSSRLRV  
SATFWQDPRNHFRQCQVQFYGLSENDEWTQDRAKPV  
TQIVSAEAWGRADC

**>MAGE-A3 TCR-Fab**

HHHHHHHSGKQEVTVQIPAAALSVPEGENLVLNCSFTDSAIYNLQWFRQDPGKGLTSLLYVVRPYQREQTSGRNLASLDKSSGRSTLY  
IAASQPGDSATYLCAVRPGGAGPFFVVFVFGKTKLSVIPIYIQNPDPVAVYQLRDSKSSDKFVCLFTDFDSQINVSQSKSDSDVYITDKC  
VLDMRSMDFK  
SNSAVAWSNKSDFTCANAFNNSIIPEDTFFPSPESCGGGGSGGGGSGGGGSEVQLVESGGGLVQPKGSLK  
LSCAASGFTFNTYAMN  
NWVRQAPGKGLEWVARIRSKYNNYATYYADSVKDRFTISRDDSQSLLYLQMN  
NLKTEDTAMYCVRHG  
NFGNSYVSWFAYWGQGLTVTSAASTKGPSVFLAPCSRSTSESTAALGCLVKDYFPEPVTVSWNSGALTS  
SGVHTFFPAVLQSSGLYSLSVVTVPSSSLGKTQYTCNV  
DHKPSNTKVDKRVESKYG

GVTQTPRYLIKTRGQVTLTSCSPISGHRVSVWYQQTPGQGLQFLFEYFSETQRNKG  
NFPGRFSGRQFSNSRSEMNVSTLELGD  
SALYLCASSFNMATGQYFGPGTRLTVTE  
DLKNVFPPEVAVFEPSEKAEISRTQKATLVCLATGFY  
PHVELS  
WVNGKEVHDGVC  
TDPQLKEQPALNDSRYALSSRLRV  
SATFWQDPRNHFRQCQVQFYGLSENDEWTQDRAKPV  
TQIVSAEAWGRADC

QAVVTQESALTTSPGETVTLTCSRSTGAVTTSNYANWVQEKPDHLFTGLIGG  
TNKRAPGVPARFSGSLIGDKAALTTGAQTEDEAIYFCALWYSNLWVFGGGTKLTVL  
GQPKAAPSVTLFPPSSEELQANKATLVCLISDFYPGAVTVAWKADSSPVKAGVETTT  
PSKQSNKYAASSYLSLTPAQWKS  
HRSYSQCQVTHEGSTVEKTVAPTEC

**>MAGE-A3 TCR-IgG**

KQEVTVQIPAAALSVPEGENLVLNCSFTDSAIYNLQWFRQDPGKGLTSLLYVVRPYQREQTSGRNLASLDKSSGRSTLYIAASQPGDSA  
TYLCAVRPGGAGPFFVVFVFGKTKLSVIPIYIQNPDPVAVYQLRDSKSSDKFVCLFTDFDSQINVSQSKSDSDVYITDKC  
VLDMRSMDFK  
SNSAVAWSNKSDFTCANAFNNSIIPEDTFFPSPPEPKSCDKTHTCP  
PCPAPEAAGGPSVFLFPPKPKDTLMI  
SRTPEVTCVVVDVSHEDPEVKFNWYVDGVEVHNAKTKPREEQYQSTYRVVSVLTVLHQD  
WLNQKEYKCKVSNKALPAPIEKTISKAKGQPREPQVYTLPPSREEMTQNVSLTCLVKGFYPSDIAVEWES  
NGQPENNYKTTTPPVVLSGDSGFFLAKSLTVDKSRWQQGNVFC  
SVMHEALHNNHYTQKLSLSLSPGK

GVTQTPRYLIKTRGQVTLTSCSPISGHRVSVWYQQTPGQGLQFLFEYFSETQRNKG  
NFPGRFSGRQFSNSRSEMNVSTLELGD  
SALYLCASSFNMATGQYFGPGTRLTVTE  
DLKNVFPPEVAVFEPSEKAEISRTQKATLVCLATGFY  
PHVELS  
WVNGKEVHDGVC  
TDPQLKEQPALNDSRYALSSRLRV  
SATFWQDPRNHFRQCQVQFYGLSENDEWTQDRAKPV  
TQIVSAEAWGRADC

EVQLVESGGGLVQPKGSLKLSCAASGFTFNTYAMN  
NWVRQAPGKGLEWVARIRSKYNNYATYYADSVKDRFTISRDDSQSLLYLQMN  
NLKTEDTAMYCVRHG  
NFGNSYVSWFAYWGQGLTVTSAASTKGPSVFLAPSSKSTSGGTAALGCLVADYFPEPVTVSWNSGALT  
SGVHTFFPAVLQSSGLYSLSAVVTVPSSSLGTQYTCNVN  
HKPSNTKVDKRVEPKSCDKTHTCP  
PCPAPEAAGGPSVFLFPPKPKDTLMI  
SRTPEVTCVVVDVSHEDPEVKFNWYVDGVEVHNAKTKPREEQYQSTYRVVSVLTVLHQD  
WLNQKEYKCKVSNKALPAPIEKTISKAKGQPREPQVYTLPPSREEMTKNQVSLCLV  
KGFYPSDIAVEWESNGQPENNYKTTTPVLDSDG  
SFFLYSLTVDKSRWQQGNVFC  
SVMHEALHNNHYTQKLSLSLSPGK

QAVVTQESALTTSPGETVTLTCSRSTGAVTTSNYANWVQEKPDHLFTGLIGG  
TNKRAPGVPARFSGSLIGDKAALTTGAQTEDEAIYFCALWYSNLWVFGGGTKLTVL  
GQPKAAPSVTLFPPSSEELQANKATLVCLISDFYPGAVTVAWKADSSPVKAGVETTT  
PSKQSNKYAASSYLSLTPAQWKS  
HRSYSQCQVTHEGSTVEKTVAPTEC

**>NY-ESO-1 TCR-scFv**

QEVTVQIPAAALSVPEGENLVLNCSFTDSAIYNLQWFRQDPGKGLTSLLLITPWQREQTSGRNLASLDKSSGRSTLYIAASQPGDSAT  
YLCAVRPLLDGTYIPTFGRGTS  
LIVHPYIQNPDPVAVYQLRDSKSSDKFVCLFTDFDSQINVSQSKSDSDVYITDKC  
VLDMRSMDFK  
NSAVAWSNKSDFTCANAFNNSIIPEDTFFPSPESCGGGGSGGGGSGGGGSEVQLVESGGGLVQPKGSLKLS  
CAASGFTFNTYAMN  
WVRQAPGKGLEWVARIRSKYNNYATYYADSVKDRFTISRDDSQSLLYLQMN  
NLKTEDTAMYCVRHG  
NFGNSYVSWFAYWGQGLTVTSAGGGGSGGGGSGGGGSAVVQESALTTSPGETVTLTCSRSTGAVTTSNYANWVQEKPDHLFTGLIGG  
TNKRAPGVPARFSGSLIGDKAALTTGAQTEDEAIYFCALWYSNLWVFGGGTKLTVLGS  
DYKDDDDKLEHHHHHHHH



GVTQTPKFQVLKGTGQSMTLQCAQDMNHEYMSWYRQDPGMGLRLIHYSVAIQTTDRGEVPNGYNVSRSTIEDFPLRLLSAAAPSQTSV  
YFCASSYLNGTGEFFGEGSRLTVLEDLKNVFPPEVAVFEPSPKAEISRTQKATLVCLATGFYPPHVELSWSWVNGKEVHDGVCITDPO  
PLKEQPALNDSRYALSRRLRVSATFWQDPRNHFRQCQVQFYGLSENDEWTQDRAKPVVTQIVSAEAWGRADC

>NY-ESO-1 TCR-Fab

HHHHHHHGSQEVQIIPAALSVPEGENLVLNCSTDSAIYNLQWFRQDPGKGLTSLLLITPWQREQTSGRNLNASLDKSSGRSTLYI  
AASQPGDSATYLC AVRPLLDGTIYPTFGRGTS LIVHPYIQNPDPVAVYQLRDSKSSDKFVCLFTDFDSQINVSQSKDSVYITDKCV  
LDMRSMDFKNSAVAWSNKSDFTCANAFNNSIIPEDTFFPSPPESSCGGGSGGGSGGGGSEVQLVESGGGLVQPKGSLKL  
SCAASGFTFNTYAMNWVRQAPGKGLEWVARIRSKYNNYATYYADSVKDRFTISRDDSQSLLYLQMNLLKTEDTAMYYCVRHGNFGN  
SYVSWFAYWGQGTTLVTVSAASTKGPSVFPLAPCSRSTSESTAALGCLVKDYFPEPVTVSWNSGALTSGVHTFPAVLQSSGLYSLSS  
VVTVPSSSLGTKTYTCNVDHKPSNTKVDKRVESKYG

GVTQTPKFQVLKGTGQSMTLQCAQDMNHEYMSWYRQDPGMGLRLIHYSVAIQTTDRGEVPNGYNVSRSTIEDFPLRLLSAAAPSQTSV  
YFCASSYLNGTGEFFGEGSRLTVLEDLKNVFPPEVAVFEPSPKAEISRTQKATLVCLATGFYPPHVELSWSWVNGKEVHDGVCITDPO  
PLKEQPALNDSRYALSRRLRVSATFWQDPRNHFRQCQVQFYGLSENDEWTQDRAKPVVTQIVSAEAWGRADC

QAVVTQESALTTSPGETVTLTCSRSTGAVTTSNYANWVQEKPDHLFTGLIGGTNKRAPGVPARFSGSLIGDKAALTTGAQTEDEA  
IYFCALWYNSLWVFGGKTLTVLQPKAAPSVTLFPPSSEELQANKATLVCLISDFYPGAVTVAWKADSSPVKAGVETTTPSKQSN  
NKYAASSYLSLTPEQWKSHRSYSCQVTHEGSTVEKTVAPTEC

>NY-ESO-1 TCR-IgG

QEVQIIPAALSVPEGENLVLNCSTDSAIYNLQWFRQDPGKGLTSLLLITPWQREQTSGRNLNASLDKSSGRSTLYIAASQPGDSAT  
YLC AVRPLLDGTIYPTFGRGTS LIVHPYIQNPDPVAVYQLRDSKSSDKFVCLFTDFDSQINVSQSKDSVYITDKCVLDMRSMDFKNS  
NSAVAWSNKSDFTCANAFNNSIIPEDTFFPSPPEPKSCDKTHTCPPCPAPEAAGGPSVFLFPPKPKDTLMI SRTPEVTCVVVDVSHED  
DPEVKFNWYVDGVEVHNAKTKPREEQYSTYRVVSVLTVLHQDWLNGKEYKCKVSNKALPAPIEKTISKAKGQPREPQVYTLPPSR  
EEMTINQVSLTCLVKGFYPSDIAVEWESNGQPENNYKTPPVPLSDGSFFLASKLTVDKSRWQQGNVFCSCVMHEALHNHYTQKSL  
SLSFGK

EVQLVESGGGLVQPKGSLKLSCAASGFTFNTYAMNWVRQAPGKGLEWVARIRSKYNNYATYYADSVKDRFTISRDDSQSLLYLQMN  
NLKTEDTAMYYCVRHGNFGNSYVSWFAYWGQGTTLVTVSAASTKGPSVFPLAPSSKSTSGGTAALGCLVADYFPEPVTVSWNSGALT  
SGVHTFPAVLQSSGLYSLASVVTVPSSSLGTQTYICNVNHKPSNTKVDKRVKPKSCDKTHTCPPCPAPEAAGGPSVFLFPPKPKDT  
LMI SRTPEVTCVVVDVSHEDPEVKFNWYVDGVEVHNAKTKPREEQYSTYRVVSVLTVLHQDWLNGKEYKCKVSNKALPAPIEKTISKAKGQPR  
PQVYTLPPSR EEMTKNQVSLTCLVKGFYPSDIAVEWESNGQPENNYKTPPVLDSDGSFFLYSLTVDKSRWQQGNVFCSCVMHEALHNHYTQKSL  
SLSFGK

GVTQTPKFQVLKGTGQSMTLQCAQDMNHEYMSWYRQDPGMGLRLIHYSVAIQTTDRGEVPNGYNVSRSTIEDFPLRLLSAAAPSQTSV  
YFCASSYLNGTGEFFGEGSRLTVLEDLKNVFPPEVAVFEPSPKAEISRTQKATLVCLATGFYPPHVELSWSWVNGKEVHDGVCITDPO  
PLKEQPALNDSRYALSRRLRVSATFWQDPRNHFRQCQVQFYGLSENDEWTQDRAKPVVTQIVSAEAWGRADC

QAVVTQESALTTSPGETVTLTCSRSTGAVTTSNYANWVQEKPDHLFTGLIGGTNKRAPGVPARFSGSLIGDKAALTTGAQTEDEA  
IYFCALWYNSLWVFGGKTLTVLQPKAAPSVTLFPPSSEELQANKATLVCLISDFYPGAVTVAWKADSSPVKAGVETTTPSKQSN  
NKYAASSYLSLTPEQWKSHRSYSCQVTHEGSTVEKTVAPTEC

>NY-ESO-1/SP34 TCR-Fab-Fc

QEVQIIPAALSVPEGENLVLNCSTDSAIYNLQWFRQDPGKGLTSLLLISPWQREQTSGRNLNASLDKSSGRSTLYIAASQPGDSAT  
YLC AVRPLLDGTIYPTFGRGTS LIVHPYIQNPDPVAVYQLRDSKSSDKFVCLFTDFDSQINVSQSKDSVYITDKCVLDMRSMDFKNS  
NSAVAWSNKSDFTCANAFNNSIIPEDTFFPSPPESSCGGGSGGGSGGGGSEVQLVESGGGLVQPKGSLKLSCAASGFTFN  
TYAMNWVRQAPGKGLEWVARIRSKYNNYATYYADSVKDRFTISRDDSQSLLYLQMNLLKTEDTAMYYCVRHGNFGNSYVSWFAYWG  
QGTTLVTVSAASTKGPSVFPLAPSSKSTSGGTAALGCLVADYFPEPVTVSWNSGALTSGVHTFPAVLQSSGLYSLASVVTVPSSSLG  
TQTYICNVNHKPSNTKVDKRVKPKSCDKTHTCPPCPAPEAAGGPSVFLFPPKPKDTLMI SRTPEVTCVVVDVSHEDPEVKFNWYVD  
GVEVHNAKTKPREEQYSTYRVVSVLTVLHQDWLNGKEYKCKVSNKALPAPIEKTISKAKGQPREPQVYTLPPSR EEMTKNQVSL  
CLVKGFYPSDIAVEWESNGQPENNYKTPPVLDSDGSFFLYSLTVDKSRWQQGNVFCSCVMHEALHNHYTQKSLSLSFGK

DKTHTCPPCPAPEAAGGPSVFLFPPKPKDTLMI SRTPEVTCVVVDVSHEDPEVKFNWYVDGVEVHNAKTKPREEQYSTYRVVSVL  
TVLHQDWLNGKEYKCKVSNKALPAPIEKTISKAKGQPREPQVYTLPPSR EEMTKNQVSLTCLVKGFYPSDIAVEWESNGQPENNYK  
TTPPVPLSDGSFFLASKLTVDKSRWQQGNVFCSCVMHEALHNHYTQKSLSLSFGK

GVTQTPKFQVLKGTGQSMTLQCAQDMNHEYMSWYRQDPGMGLRLIHYSVAIQTTDRGEVPNGYNVSRSTIEDFPLRLLSAAAPSQTSV  
YFCASSYLNGTGEFFGEGSRLTVLEDLKNVFPPEVAVFEPSPKAEISRTQKATLVCLATGFYPPHVELSWSWVNGKEVHDGVCITDPO  
PLKEQPALNDSRYALSRRLRVSATFWQDPRNHFRQCQVQFYGLSENDEWTQDRAKPVVTQIVSAEAWGRADC

QAVVTQESALTTSPGETVTLTCRSSTGAVTTSNYANWVQEKPDHLFTGLIGGTNKRAPGVPARFSGSLIGDKAALTTGAQTEDEA  
IYFCALWYNLWVFGGGTKLTVLQPKAAPSVTLFPPSSEELQANKATLVCLISDFYPGAVTVAWKADSSPVKAGVETTTPSKQSN  
NKYAASSYLSLTPQWKSHRYSYSCQVTHEGSTVEKTVAPTEC

>NY-ESO-1/SP34 TCR-Fab-IgG

QEVVTQIPAAALSVPEGENLVLNCSFTDSAIYNLQWFRQDPGKGLTSLLLISPWQREQTSGRNLASLDKSSGRSTLYIAASQPGDSAT  
YLC AVRPLLDGTYIPTFGRGTS LIVHPYIQNPDPVAVYQLRDSKSSDKFVCLFTDFDSQINVSQSKSDSVYITDKCVLDMRSMDFKS  
NSAVAWSNKSDFTCANAFNNSIIPEDTFFPSPESSCGGGGSGGGSGGGSGGGSEVQLVESGGGLVQPKGSLKLSCAASGFTFN  
TYAMNWRQAPGKGLEWVARIRSKYNNYATYYADSVKDRFTISRDDSQSLLYLQMNLLKTEDTAMYYCVRHGNFNGNSYVSWFAYWG  
QGTTLVTVSAASTKGPSVFLAPSSKSTSGGTAALGCLVADYFPEPVTVSWNSGALTSVHTFFPAVLQSSGLYSLASVTVPSSSLG  
TQTYICNVNHKPSNTKVDKRVPEPKSCDKHTHTCPPCPAPEAAGGPSVFLFPPKPKDTLMISRTPPEVTCVVVDVSHEDPEVKFNWYVD  
GVEVHNAKTKPREEQYSTYRVVSVLTVLHQDWLNGKEYKCKVSNKALPAPIEKTIISKAKGQPRSPVYITLPPSREEMTKNQVSLV  
CLVKGFIYPSDIAVEWESNGQPENNYKTTTPVLDSDGSFFLYSLTVDKSRWQQGNVFCSCVMHEALHNHYTQKLSLSLSPGK

QEVVTQIPAAALSVPEGENLVLNCSFTDSAIYNLQWFRQDPGKGLTSLLLITPWQREQTSGRNLASLDKSSGRSTLYIAASQPGDSAT  
YLC AVRPLLDGTYIPTFGRGTS LIVHPYIQNPDPVAVYQLRDSKSSDKFVCLFTDFDSQINVSQSKSDSVYITDKCVLDMRSMDFKS  
NSAVAWSNKSDFTCANAFNNSIIPEDTFFPSPPEPKSCDKHTHTCPPCPAPEAAGGPSVFLFPPKPKDTLMISRTPPEVTCVVVDVSHED  
DPEVKFNWYVDGVEVHNAKTKPREEQYSTYRVVSVLTVLHQDWLNGKEYKCKVSNKALPAPIEKTIISKAKGQPREPQVYITLPPSR  
EEMTKNQVSLTCLVKGFYPSDIAVEWESNGQPENNYKTTTPVLDSDGSFFLYSLTVDKSRWQQGNVFCSCVMHEALHNHYTQKLS  
LSLSPGK

GVTQTPKFQVLKGTGQSMTLQCAQDMNHEYMSWYRQDPGMGLRLIHYSVAIQTTDRGEVPNGYNVSRSTIEDFPLRLLSAAAPSQTSV  
YFCASSYLNTGELFFGEGSRLTVLEDLKNVFPPEVAVFEPSPKAEISRITQKATLVCLATGFYPPHVELS WVVNGKEVHDGVCITDPO  
PLKEQPALNDSRYALSRLRVSATFWQDPRNHFRQVQFYGLSENDEWTDRAKPVTVQIVSAEAWGRADC

QAVVTQESALTTSPGETVTLTCRSSTGAVTTSNYANWVQEKPDHLFTGLIGGTNKRAPGVPARFSGSLIGDKAALTTGAQTEDEA  
IYFCALWYNLWVFGGGTKLTVLQPKAAPSVTLFPPSSEELQANKATLVCLISDFYPGAVTVAWKADSSPVKAGVETTTPSKQSN  
NKYAASSYLSLTPQWKSHRYSYSCQVTHEGSTVEKTVAPTEC

>2TCR.1-Fab

HHHHHHHHSQEVVTQIPAAALSVPEGENLVLNCSFTDSAIYNLQWFRQDPGKGLTSLLLISPWQREQTSGRNLASLDKSSGRSTLYI  
AASQPGDSATYLC AVRPLLDGTYIPTFGRGTS LIVHPYIQNPDPVAVYQLRDSKSSDKFVCLFTDFDSQINVSQSKSDSVYITDKCV  
LDMRSMDFKSN SAVAWSNKSDFTCANAFNNSIIPEDTFFPSPESSCGGGGSGGGSGGGSGGGSEVTVQIPAAALSVPEGENLV  
NCSFTDSAIYNLQWFRQDPGKGLTSLLLISPWQREQTSGRNLASLDKSSGRSTLYIAASQPGDSATYLC AVRPLLDGTYIPTFGRG  
TSLIVHPYIQNPDPVAVYQLRDSKSSDKFVCLFTDFDSQINVSQSKSDSVYITDKCVLDMRSMDFKSN SAVAWSNKSDFTCANAFN  
SIIIPEDTFFPSPESSCGGGGSGGGSGGGSGGGSEVQLVESGGGLVQPKGSLKLSCAASGFTFN TYAMNWRQAPGKGLEWVAR  
IRSKYNNYATYYADSVKDRFTISRDDSQSLLYLQMNLLKTEDTAMYYCVRHGNFNGNSYVSWFAYWGQGTTLVTVSAASTKGPSVFL  
APCSRSTSESTAALGCLVKDYFPEPVTVSWNSGALTSVHTFFPAVLQSSGLYSLSSVTVPSSSLGKTYTCNVDPKPSNTKVDK  
VESKYG

QAVVTQESALTTSPGETVTLTCRSSTGAVTTSNYANWVQEKPDHLFTGLIGGTNKRAPGVPARFSGSLIGDKAALTTGAQTEDEA  
IYFCALWYNLWVFGGGTKLTVLQPKAAPSVTLFPPSSEELQANKATLVCLISDFYPGAVTVAWKADSSPVKAGVETTTPSKQSN  
NKYAASSYLSLTPQWKSHRYSYSCQVTHEGSTVEKTVAPTEC

GVTQTPKFQVLKGTGQSMTLQCAQDMNHEYMSWYRQDPGMGLRLIHYSVAIQTTDRGEVPNGYNVSRSTIEDFPLRLLSAAAPSQTSV  
YFCASSYLNTGELFFGEGSRLTVLEDLKNVFPPEVAVFEPSPKAEISRITQKATLVCLATGFYPPHVELS WVVNGKEVHDGVCITDPO  
PLKEQPALNDSRYALSRLRVSATFWQDPRNHFRQVQFYGLSENDEWTDRAKPVTVQIVSAEAWGRADC

>2TCR.2-Fab

HHHHHHHHSQEVVTQIPAAALSVPEGENLVLNCSFTDSAIYNLQWFRQDPGKGLTSLLLISPWQREQTSGRNLASLDKSSGRSTLYI  
AASQPGDSATYLC AVRPLLDGTYIPTFGRGTS LIVHPYIQNPDPVAVYQLRDSKSSDKFVCLFTDFDSQINVSQSKSDSVYITDKCV  
LDMRSMDFKSN SAVAWSNKSDFTCANAFNNSIIPEDTFFPSPESSCGGGGSGGGSGGGSGGGSEVQLVESGGGLVQPKGSLK  
SCAASGFTFN TYAMNWRQAPGKGLEWVARIRSKYNNYATYYADSVKDRFTISRDDSQSLLYLQMNLLKTEDTAMYYCVRHGNFNG  
SYVSWFAYWGQGTTLVTVSAASTKGPSVFLAPCSRSTSESTAALGCLVKDYFPEPVTVSWNSGALTSVHTFFPAVLQSSGLYSLSS  
VTVPSSSLGKTYTCNVDPKPSNTKVDKRVESKYGGGGSGGGSGGGSGGGSEVTVQIPAAALSVPEGENLVLNCSFTDSAIY  
NLQWFRQDPGKGLTSLLLISPWQREQTSGRNLASLDKSSGRSTLYIAASQPGDSATYLC AVRPLLDGTYIPTFGRGTS LIVHPYIQ  
NPDPVAVYQLRDSKSSDKFVCLFVCLFTDFDSQINVSQSKSDSVYITDKCVLDMRSMDFKSN SAVAWSNKSDFTCANAFNNSIIPED  
TFFPSPESSC

QAVVTQESALTTSPGETVTLTCRSSTGAVTTSNYANWVQEKPDHLFTGLIGGTNKRAPGVPARFSGSLIGDKAALTTGAQTEDEA  
IYFCALWYNLWVFGGGTKLTVLQPKAAPSVTLFPPSSEELQANKATLVCLISDFYPGAVTVAWKADSSPVKAGVETTTPSKQSN  
NKYAASSYLSLTPQWKSHRYSYSCQVTHEGSTVEKTVAPTEC

GVTQTPKFQVLKGTGQSMTLQCAQDMNHEYMSWYRQDPGMGLRLIHYSVAIQTTDRGEVPPNGYNVSRSTIEDFPLRLLSAAAPSQTSV  
 YFCASSYLNTGELFFGEGSRLTVLEDLKNVFPPEVAVFEPSEKAEISRTQKATLVCLATGFYPPHVELSWVWNGKEVHDGVCTDPO  
 PLKEQPALNDSRYALSRRLRVSATFWQDPRNHFRQVQFYGLSENDEWTQDRAKPVVTQIVSAEAWGRADC

### >2TCR.3-Fab

HHHHHHHGGSEVQLVESGGGLVQPKGSLKLSAASGFTFNNTYAMNWVRQAPGKGLEWVARIRSKYNNYATYYADSVKDRFTISRDD  
 SQSLLYLQMNLLKTEDTAMYCVRHGNFGNSYVSWFAYWQGTLVTVSAASTKGPSVFLAPCSRSTSESTAALGCLVKDYFPEPV  
 TVSWNSGALTSGVHTFPAVLQSSGLYSLSVVTVPSSSLGKTYTCNVNKHPSNTKVDKRVEVKYGGGGGGGGGGGGGGGGGGGGGGGG  
 QEVTVIQAALSVPEGENLVNCSFTDSAIYNLQWFRQDPGKGLTSLLLISPWQREQTSGRNLASLDKSSGRSTLYIAASQPGDSAT  
 YLCAVRPLLDGTYIPTFGRGTSLVHPIYIQNPDPVAVYQLRDSKSSDKFVCLFTDFDSQINVSQSKSDSVYITDKCVLDMRSMDFKS  
 NSAVAWSNKSDFTCANAFNNSIIPEDTFFPSPESPSSCGGGGGGGGGGGGGGGGGGGGGGGGGGGGGGGGGGGGGGGGGGGGGGGGG  
 NLQWFRQDPGKGLTSLLLISPWQREQTSGRNLASLDKSSGRSTLYIAASQPGDSATYLCAVRPLLDGTYIPTFGRGTSLVHPIYIQ  
 NPDPVAVYQLRDSKSSDKFVCLFTDFDSQINVSQSKSDSVYITDKCVLDMRSMDFKSN SAVAWSNKSDFTCANAFNNSIIPEDTFFP  
 SPSSC

QAVVTQESALTTSPGETVTLTCSRSTGAVTTSNYANWVQEKPDHLFTGLIGGNTKRAPGVPARFSGSLIGDKAALITGAQTEDEA  
 IYFCALWYNSLWVFGGKTLTVLQPKAAPSVTLPFPSSSEELQANKATLVCLISDFYPGAVTVAWKADSSPVKAGVETTTTPSKQSN  
 NKYAASSYLSLTPQWKSHRSYSQCQVTHEGSTVEKTVAPTEC

GVTQTPKFQVLKGTGQSMTLQCAQDMNHEYMSWYRQDPGMGLRLIHYSVAIQTTDRGEVPPNGYNVSRSTIEDFPLRLLSAAAPSQTSV  
 YFCASSYLNTGELFFGEGSRLTVLEDLKNVFPPEVAVFEPSEKAEISRTQKATLVCLATGFYPPHVELSWVWNGKEVHDGVCTDPO  
 PLKEQPALNDSRYALSRRLRVSATFWQDPRNHFRQVQFYGLSENDEWTQDRAKPVVTQIVSAEAWGRADC

### >2TCR.1-IgG

QEVTVIQAALSVPEGENLVNCSFTDSAIYNLQWFRQDPGKGLTSLLLISPWQREQTSGRNLASLDKSSGRSTLYIAASQPGDSAT  
 YLCAVRPLLDGTYIPTFGRGTSLVHPIYIQNPDPVAVYQLRDSKSSDKFVCLFTDFDSQINVSQSKSDSVYITDKCVLDMRSMDFKS  
 NSAVAWSNKSDFTCANAFNNSIIPEDTFFPSPESPSSCGGGGGGGGGGGGGGGGGGGGGGGGGGGGGGGGGGGGGGGGGGGGGGGGG  
 QGTLVTVSAASTKGPSVFLAPSSKSTSGGTAALGCLVADYFPEPVTVSWNSGALTSGVHTFPAVLQSSGLYSLSVVTVPSSSLG  
 TQTYICNVNKHPSNTKVDKRVEPKSCDKTHTCPCPAPEAAGGPSVFLFPPKPKDTLMIISRTPEVTCVVVDVSHEDPEVKFNWYVD  
 GVEVHNAKTKPREEQYSTYRVVSVLTVLHQDWLNGKEYKCKVSNKALPAPIEKTISKAKGQPRPQVYTLPPSREEMTKNQVSLV  
 CLVKGFYPSDIAVEWESNGQPENNYKTPPVLDSDGSFFLYSLLTVLTDKSRWQQGNVSCSVMHEALHNHYTQKSLSLSPGK

DKTHTCPCPAPEAAGGPSVFLFPPKPKDTLMIISRTPEVTCVVVDVSHEDPEVKFNWYVDGVEVHNAKTKPREEQYSTYRVVSVL  
 TVLHQDWLNGKEYKCKVSNKALPAPIEKTISKAKGQPREPQVYTLPPSREEMTKNQVSLTCLVKGFYPSDIAVEWESNGQPENNYK  
 TTPPVLDSDGSFFLYSKLTVLTDKSRWQQGNVSCSVMHEALHNHYTQKSLSLSPGKGGGGGGGGGGGGGGGGGGGGGGGGGGGGGGGGGG  
 VPEGENLVNCSFTDSAIYNLQWFRQDPGKGLTSLLLISPWQREQTSGRNLASLDKSSGRSTLYIAASQPGDSATYLCAVRPLLDG  
 TYIPTFGRGTSLVHPIYIQNPDPVAVYQLRDSKSSDKFVCLFTDFDSQINVSQSKSDSVYITDKCVLDMRSMDFKSN SAVAWSNKSD  
 FTCANAFNNSIIPEDTFFPSPESPSSC

QAVVTQESALTTSPGETVTLTCSRSTGAVTTSNYANWVQEKPDHLFTGLIGGNTKRAPGVPARFSGSLIGDKAALITGAQTEDEA  
 IYFCALWYNSLWVFGGKTLTVLQPKAAPSVTLPFPSSSEELQANKATLVCLISDFYPGAVTVAWKADSSPVKAGVETTTTPSKQSN  
 NKYAASSYLSLTPQWKSHRSYSQCQVTHEGSTVEKTVAPTEC

GVTQTPKFQVLKGTGQSMTLQCAQDMNHEYMSWYRQDPGMGLRLIHYSVAIQTTDRGEVPPNGYNVSRSTIEDFPLRLLSAAAPSQTSV  
 YFCASSYLNTGELFFGEGSRLTVLEDLKNVFPPEVAVFEPSEKAEISRTQKATLVCLATGFYPPHVELSWVWNGKEVHDGVCTDPO  
 PLKEQPALNDSRYALSRRLRVSATFWQDPRNHFRQVQFYGLSENDEWTQDRAKPVVTQIVSAEAWGRADC

### >2TCR.2-IgG

EVQLVESGGGLVQPKGSLKLSAASGFTFNNTYAMNWVRQAPGKGLEWVARIRSKYNNYATYYADSVKDRFTISRDDSQSLLYLQMN  
 NLKTEDTAMYCVRHGNFGNSYVSWFAYWQGTLVTVSAASTKGPSVFLAPCSRSTSESTAALGCLVKDYFPEPVTVSWNSGALT  
 SGVHTFPAVLQSSGLYSLSVVTVPSSSLGKTYTCNVNKHPSNTKVDKRVEVKYGGGGGGGGGGGGGGGGGGGGGGGGGGGGGGGGGG  
 VPEGENLVNCSFTDSAIYNLQWFRQDPGKGLTSLLLISPWQREQTSGRNLASLDKSSGRSTLYIAASQPGDSATYLCAVRPLLDG  
 TYIPTFGRGTSLVHPIYIQNPDPVAVYQLRDSKSSDKFVCLFTDFDSQINVSQSKSDSVYITDKCVLDMRSMDFKSN SAVAWSNKSD  
 FTCANAFNNSIIPEDTFFPSPESPSSCDKHTCPCPAPEAAGGPSVFLFPPKPKDTLMIISRTPEVTCVVVDVSHEDPEVKFNWYVD  
 GVEVHNAKTKPREEQYSTYRVVSVLTVLHQDWLNGKEYKCKVSNKALPAPIEKTISKAKGQPRPQVYTLPPSREEMTKNQVSLV  
 CLVKGFYPSDIAVEWESNGQPENNYKTPPVLDSDGSFFLYSLLTVLTDKSRWQQGNVSCSVMHEALHNHYTQKSLSLSPGK

DKTHTCPCPAPEAAGGPSVFLFPPKPKDTLMIISRTPEVTCVVVDVSHEDPEVKFNWYVDGVEVHNAKTKPREEQYSTYRVVSVL  
 TVLHQDWLNGKEYKCKVSNKALPAPIEKTISKAKGQPREPQVYTLPPSREEMTKNQVSLTCLVKGFYPSDIAVEWESNGQPENNYK  
 TTPPVLDSDGSFFLYSKLTVLTDKSRWQQGNVSCSVMHEALHNHYTQKSLSLSPGKGGGGGGGGGGGGGGGGGGGGGGGGGGGGGGGGGG  
 VPEGENLVNCSFTDSAIYNLQWFRQDPGKGLTSLLLISPWQREQTSGRNLASLDKSSGRSTLYIAASQPGDSATYLCAVRPLLDG

TYIPTFGRGTS LIVHPYIQNPDPVYQLRDSKSSDKFVCLFTDFDSQINVSQSKSDSVYITDKCVLDMRSMDFKSNSAVAWSNKSD  
 FT CANAFNNSI IPEDTFFPSPEPKSC

QAVVTQESALTTSPGETVTLTCRSSTGAVTTSNYANWVQEKPDHLFTGLIGGTNKRAPGVPARFSGSLIGDKAALITGAQTEDEA  
 IYFCALWYNSLWVFGGKTLTVLQPKAAPSVTLFPPSSEELQANKATLVCLISDFYPGAVTVAWKADSSPVKAGVETTTPSKQSN  
 NKYAASSYLSLTPQWKS HRYSYSCQVTHEGSTVEKTVAPTEC

GVTQTPKFQVLKGTGQSMTLQCAQDMNHEYMSWYRQDPGMGLRLIHYSVAIQTTDRGEVPNGYNVSRSTIEDFLRLLSAAAPSQTSV  
 YFCASSYLNGTGFEGSRLTVLEDLKNVFPPEVAVFEPKAEISRTQKATLVCLATGFYPHVELSWVWNGKEVHDGVC TDPQ  
 PLKEQPALNDSRYALSRLRVSATFWQDPRNHFRQCQVQFYGLSENDEWTQDRAKPVTVQIVSAEAWGRADC

>2TCR.3-IgG

EVQLVESGGGLVQPKGSLKLSCAASGFTFNTYAMNWVRQAPGKGLEWVARIRSKYNNYATYYADSVKDRFTISRDDSQSLLYLQMN  
 NLKTEDTAMYCVRHGNFGNSYVSWFAYWGGTGLVTVSAASTKGPSVFLPAPCSRSTSESTAAALGCLVKDYFPEPVTVSWNSGALT  
 SGVHTFPAVLQSSGLYSLSSVTVTPSSSLGKTYTCNVDPKPSNTKVDKRVESKYGGGGSGGGGSGGGGSGGGGSGQEVTPAALS  
 VPEGENLVLNCSTDSAIYNLQWFRQDPGKGLTSLLLISPWQREQTSGRNLASLDKSSGRSTLYIAASQPGDSATYLCVAVRPLLDG  
 TYIPTFGRGTS LIVHPYIQNPDPVYQLRDSKSSDKFVCLFTDFDSQINVSQSKSDSVYITDKCVLDMRSMDFKSNSAVAWSNKSD  
 FT CANAFNNSI IPEDTFFPSPEPKSCDKHTHTCPPCPAPEAAGGPSVFLFPPKPKDTLMI SRTEVTCVVDVSHEDPEVKFNWYVD  
 GVEVHNAKTKPREEQYQSTYRVVSVLTVLHQDWLNGKEYKCKVSNKALPAPIEKTISKAKGQPRRPVYVYTLPPSREEMTKNQVSLV  
 CLVKGFPYPSDIAVEWESNGQPENNYKTTTPVLDSDGSFFLYSRLTVDKSRWQQGNVFCSCVMHEALHNHYTQKLSLSLSPGK

QEVTPAALSVP EGENLVLNCSTDSAIYNLQWFRQDPGKGLTSLLLITPWQREQTSGRNLASLDKSSGRSTLYIAASQPGDSAT  
 YLCVAVRPLLDGTYIPTFGRGTS LIVHPYIQNPDPVYQLRDSKSSDKFVCLFTDFDSQINVSQSKSDSVYITDKCVLDMRSMDFKS  
 NSAVAWSNKSDFT CANAFNNSI IPEDTFFPSPEPKSCDKHTHTCPPCPAPEAAGGPSVFLFPPKPKDTLMI SRTEVTCVVDVSHED  
 PEVKFNWYVDGVEVHNAKTKPREEQYQSTYRVVSVLTVLHQDWLNGKEYKCKVSNKALPAPIEKTISKAKGQPRRPVYVYTLPPSR  
 EEMTKNQVSLTCLVKGFYPSDIAVEWESNGQPENNYKTTTPVLDSDGSFFLYSRLTVDKSRWQQGNVFCSCVMHEALHNHYTQKLS  
 SLSLSPGK

QAVVTQESALTTSPGETVTLTCRSSTGAVTTSNYANWVQEKPDHLFTGLIGGTNKRAPGVPARFSGSLIGDKAALITGAQTEDEA  
 IYFCALWYNSLWVFGGKTLTVLQPKAAPSVTLFPPSSEELQANKATLVCLISDFYPGAVTVAWKADSSPVKAGVETTTPSKQSN  
 NKYAASSYLSLTPQWKS HRYSYSCQVTHEGSTVEKTVAPTEC

GVTQTPKFQVLKGTGQSMTLQCAQDMNHEYMSWYRQDPGMGLRLIHYSVAIQTTDRGEVPNGYNVSRSTIEDFLRLLSAAAPSQTSV  
 YFCASSYLNGTGFEGSRLTVLEDLKNVFPPEVAVFEPKAEISRTQKATLVCLATGFYPHVELSWVWNGKEVHDGVC TDPQ  
 PLKEQPALNDSRYALSRLRVSATFWQDPRNHFRQCQVQFYGLSENDEWTQDRAKPVTVQIVSAEAWGRADC

>2TCR.4-IgG

QEVTPAALSVP EGENLVLNCSTDSAIYNLQWFRQDPGKGLTSLLLISPWQREQTSGRNLASLDKSSGRSTLYIAASQPGDSAT  
 YLCVAVRPLLDGTYIPTFGRGTS LIVHPYIQNPDPVYQLRDSKSSDKFVCLFTDFDSQINVSQSKSDSVYITDKCVLDMRSMDFKS  
 NSAVAWSNKSDFT CANAFNNSI IPEDTFFPSPEPKSCDKHTHTCPPCPAPEAAGGPSVFLFPPKPKDTLMI SRTEVTCVVDVSHED  
 PEVKFNWYVDGVEVHNAKTKPREEQYQSTYRVVSVLTVLHQDWLNGKEYKCKVSNKALPAPIEKTISKAKGQPRRPVYVYTLPPSRE  
 EMTKNQVSLVCLVKGFPYPSDIAVEWESNGQPENNYKTTTPVLDSDGSFFLYSRLTVDKSRWQQGNVFCSCVMHEALHNHYTQKLS  
 LSPGKGGGGSGGGGSGGGGSGGGGSEVQLVESGGGLVQPKGSLKLSCAASGFTFNTYAMNWVRQAPGKGLEWVARIRSKYNNYATY  
 YADSVKDRFTISRDDSQSLLYLQMN NLKTEDTAMYCVRHGNFGNSYVSWFAYWGGTGLVTVSAASTKGPSVFLPAPCSRSTSEST  
 AALGCLVKDYFPEPVTVSWNSGALTS GVHTFPAVLQSSGLYSLSSVTVTPSSSLGKTYTCNVDPKPSNTKVDKRVESKYG

QEVTPAALSVP EGENLVLNCSTDSAIYNLQWFRQDPGKGLTSLLLITPWQREQTSGRNLASLDKSSGRSTLYIAASQPGDSAT  
 YLCVAVRPLLDGTYIPTFGRGTS LIVHPYIQNPDPVYQLRDSKSSDKFVCLFTDFDSQINVSQSKSDSVYITDKCVLDMRSMDFKS  
 NSAVAWSNKSDFT CANAFNNSI IPEDTFFPSPEPKSCDKHTHTCPPCPAPEAAGGPSVFLFPPKPKDTLMI SRTEVTCVVDVSHED  
 PEVKFNWYVDGVEVHNAKTKPREEQYQSTYRVVSVLTVLHQDWLNGKEYKCKVSNKALPAPIEKTISKAKGQPRRPVYVYTLPPSR  
 EEMTKNQVSLTCLVKGFYPSDIAVEWESNGQPENNYKTTTPVLDSDGSFFLYSRLTVDKSRWQQGNVFCSCVMHEALHNHYTQKLS  
 SLSLSPGK

QAVVTQESALTTSPGETVTLTCRSSTGAVTTSNYANWVQEKPDHLFTGLIGGTNKRAPGVPARFSGSLIGDKAALITGAQTEDEA  
 IYFCALWYNSLWVFGGKTLTVLQPKAAPSVTLFPPSSEELQANKATLVCLISDFYPGAVTVAWKADSSPVKAGVETTTPSKQSN  
 NKYAASSYLSLTPQWKS HRYSYSCQVTHEGSTVEKTVAPTEC

GVTQTPKFQVLKGTGQSMTLQCAQDMNHEYMSWYRQDPGMGLRLIHYSVAIQTTDRGEVPNGYNVSRSTIEDFLRLLSAAAPSQTSV  
 YFCASSYLNGTGFEGSRLTVLEDLKNVFPPEVAVFEPKAEISRTQKATLVCLATGFYPHVELSWVWNGKEVHDGVC TDPQ  
 PLKEQPALNDSRYALSRLRVSATFWQDPRNHFRQCQVQFYGLSENDEWTQDRAKPVTVQIVSAEAWGRADC
